# Supplementary material
Source: PubMed Central journal article supplement (PMC2962485)
Supplement: supp_M110.149385_Pointon_etal_SI.pdf [file supp_M110.149385_Pointon_etal_SI.pdf]

# Supplemental Data

## **A HIGHLY UNUSUAL THIOESTER BOND IN A PILUS ADHESIN IS REQUIRED FOR EFFICIENT HOST CELL INTERACTION**

Pointon JA<sup>1</sup>, Smith WD<sup>1</sup>, Saalbach G<sup>2</sup>, Crow A<sup>2</sup>, Kehoe MA<sup>1</sup>, & Banfield MJ<sup>2</sup>

<sup>1</sup>Institute for Cell and Molecular Biosciences, Newcastle University, Framlington Place,  
Newcastle upon Tyne, NE2 4HH, UK, <sup>2</sup>Dept. of Biological Chemistry, John Innes Centre, Colney  
Lane, Norwich, NR4 7UH, UK

## **Supplemental Text**

### **Sequence conservation of Spy0125 in GAS**

Sequence alignments of Spy0125 homologues are shown in Supplemental Figure 1A (CTR) and Supplemental Figure 1B (NTR). Overall, the sequences of these proteins are well conserved across GAS serotypes. Key residues that comprise the thioester and isopeptide bond linkages, and their immediate surrounds are conserved. The lack of an N-terminal region in the M5 and M18 strains of GAS is worth noting. Also, despite being dispensable for Spy0125 binding to HaCaT cells, the NTR contains some sequence conservation, and a very similar spatial distribution, at the residue positions that comprise the thioester in the CTR. There is, however, only limited sequence identity (~17 %) between the Spy0125-NTR and the region that comprises the top domain of Spy0125-CTR. Alignments were produced using CLUSTALW2 (1).

### **Additional description of structures**

Within each of the models, the domains adopt a very similar structure to each other. Overlays of the middle domains with their equivalent regions in all structures generates rmsds over the range 0.25 – 0.50 Å (81 – 85 equivalent C<sub>α</sub> positions); for the top domains a range of 0.06 – 0.55 Å is observed (185 – 194 equivalent C<sub>α</sub> positions); and for the bottom domains the values are 0.053 – 0.33 Å (115 – 117 equivalent C<sub>α</sub> positions, note: the lower values of the range represent rmsds allowed by the NCS restraints, which were maintained in the last rounds of refinement).

There is a single region in the structures of Spy0125-CTR that adopts a different conformation in the A-form and B-form crystals (not counting regions discussed elsewhere as prone to rearrangements/disorder). In each crystal form the region including residues Asp439 – Val453 is well defined in the electron density. Crystal contacts within this region differ between the structures and this is the most likely reason for this subtle rearrangement.

### **Disorder in the Spy0125-CTR crystals**

Analysis of the fit of the models to the electron density in each of the Spy0125-CTR structures reveals some degree of structural disorder/flexibility within the protein at the domain level. Residual electron density within the A-form crystals, adjacent to the modeled C-terminus of each

chain, suggests the presence of the bottom domain in the crystal. However, it is not possible to reliably position this region, even though there is space in the lattice (Supplemental Figure 2A). Molecular replacement calculations using the final model of the bottom domain from the B-form crystals reveals positions for this domain allowable by packing constraints in the A-form lattice. Despite this, subsequent refinement in REFMAC5 (with these domains included) reveals an essentially unchanged  $R_{free}$  and inspection of resulting electron density maps does not allow an atomic model for this domain to be constructed. Therefore, this domain is not included in the final model, which leads to an apparent non-continuous crystal lattice (Supplemental Figure 2A). This kind of crystallographic disorder is not without precedent (2).

In the model derived from the B-form crystals, with data collected at the ESRF to 2.9 Å, the region comprising residues B470 – B560 shows a significantly poorer fit to the electron density compared to the rest of the model and has higher than average atomic displacement parameters. This region comprises part of the top domain (Supplemental Fig. 2B) and refines in the same conformation as found in the two molecules of the A-form crystals, the B-form model based on the DLS data and the equivalent region in the A-chain of the same asymmetric unit. Removal of this region leads to a poorer model, as judged by an increase in  $R_{free}$ , therefore it is retained in the final structure.

In the B-form crystal structure, refined against the DLS data, the C-terminal (bottom) domain of the A-chain (residues 604 – 719) displays a rather poor fit to the electron density in a number of regions and displays higher than average atomic displacement parameters compared to the same region in the other structures determined (Supplemental Figure 2B). As refined, this region assumes the same conformation as that observed in the B-form crystals derived from the ESRF data and the B-chain of the same asymmetric unit, for which the electron density is considerably better. Removal of this region leads to a poorer model, as judged by an increase in  $R_{free}$ , therefore it is retained in the final structure.

## REFERENCES

1. Larkin, M. A., Blackshields, G., Brown, N. P., Chenna, R., McGettigan, P. A., McWilliam, H., Valentin, F., Wallace, I. M., Wilm, A., Lopez, R., Thompson, J. D., Gibson, T. J., and Higgins, D. G. (2007) *Bioinformatics* **23**, 2947-2948
2. van Raaij, M. J., Schoehn, G., Burda, M. R., and Miller, S. (2001) *J Mol Biol* **314**, 1137-1146

## Supplemental Figure Legends

Supplemental Fig. 1 Sequence alignment of Spy0125 (M1) homologues in Group A *Streptococci*, encompassing **(A)** Spy0125-CTR, **(B)** Spy0125-NTR. In **(A)**, residues to the C-terminus of the sortase signal sequence (not present in the mature protein) are not shown. To the N-terminus, the residues in gray font show the end of the N-terminal region (M1, M28, M12, M49, M3) or the predicted start of the mature protein (after signal peptide cleavage, M5 and M18); note the poly-proline signature in all homologues that have an N-terminal region. Residues that comprise the thioester and isopeptide bonds are highlighted in red and yellow/green respectively. The glutamates that catalyse formation of the isopeptides are shown in magenta, with the surrounding hydrophobic side chains in cyan. In **(B)**, residues in pink are those predicted to encompass the secretion signal sequence. Residues in gray are those in the CTR. Residues that have sequence homology and relative spatial separation to residues comprising the thioester in the CTR are in highlighted in yellow.

Supplemental Fig. 2 Disorder in the structures of Spy0125. **(A)** Approximately orthogonal views of the apparent non-continuous lattice in the A-form crystal structure of Spy0125-CTR when a model for the bottom domain is not included (the two molecules of one asymmetric unit are shown in red/green). Closest atom-atom distance  $\sim 16 \text{ \AA}$  between the layers in the plane of the image. **(B)** Regions of domain flexibility observed in certain molecules in the structures of Spy0125-CTR (see Supplemental Text).

Supplemental Fig. 3 MS/MS spectra of the peptides encompassing the isopeptide bonds in Spy0125-CTR. **(A)** Peptide with  $m/z 774.37^{2+}$  containing the Lys297-Asp595 isopeptide bond. Fragment masses containing the isopeptide bond (as labeled) all include the loss of a water molecule. All fragments are in the 1+ charge state. **(B)** Peptide with  $m/z 743.18^{4+}$  containing the Lys610-Asn715 isopeptide bond. Fragment masses containing the isopeptide bond (as labeled) all include the loss of an  $\text{NH}_3$  unit. All fragments are in the 2+ charge state. The peak of mass 1377.38 Da extends to 100 % relative abundance (the plot has been cut and zoomed to observe less abundant peaks).

Supplemental Fig. 4 Quantitation of mass spectrometry data using peptide intensity data. **(A)** The peptide containing position 575 returns a Glu  $\sim 7$  times more frequently than Gln. **(B)** Alkylated

peptide that contains Cys426 is ~ 30 times more abundant in samples where the protein was pre-treated with methylamine (MA) and iodoacetamide (IAA) compared to iodoacetamide alone.

Supplemental Fig. 5 Intrinsic protein fluorescence. **(A)** Excitation and emission spectra for wild-type and Cys426Ala variant Spy0125-CTR. **(B)** Excitation and emission spectra of native (folded) and urea-unfolded Spy0125-CTR. **(C)** Emission spectra for the wild-type protein in increasing urea concentrations. The change in the spectra is shown in the inset. **(D)** Urea-dependent changes in intrinsic protein fluorescence at 360 nm for wild-type and the Cys426Ala variant.

**A**

```

M1 259 -NKG YQNLLSGGLVPTKPPTPGDPPMPNQPQTTSVLRKYAIGDY SKLLEGATLQLTGDNVNSFQARVFSNDIGERIELSDGTYTLTELNSFAGYSIAEPIITFKVEAGKVYTIID-GKQ 377
M28 253 ----FQNLLSAEYVDPDTPPKPGE--EPPAKTEKTSVIRKYAEGDY SKLLEGATLRLTGEDI PDFQEKVFQSNGTGEKIELSNGTYTLTETSSFDGYKIAEPIKFRVNVKVFIVQKDG SQ 367
M12 254 ----VQNLLSAEYVPESPPAPGQSPEPPVQTKKTSVIRKYAEGDY SKLLEGATLRLTGEDILDFQEKVFQSNGTGEKIELSNGTYTLTETSSFDGYKIAEPIKFRVNVKVFIVQKDG SQ 370
M49 246 ----FQNLLSAEYVDPDTPPKPGE--EPPAKTEKTSVIRKYAEGDY SKLLEGATLKLKLSQIEGSGFQEKDFQSNLGETVELPNGTYTLTETSSFDGYKIAEPIKFRVENKVFIVQKDG SQ 360
M3 247 ----FQNLLSAEYVDPDTPPKPGE--EPPAKTEKTSVIRKYAEGDY SKLLEGATLKLKLSQIEGSGFQEKDFQSNLGETVELPNGTYTLTETSSFDGYKIAEPIKFRVENKVFIVQKDG SQ 361
M5 41 -----IRAFGAE--EKSTETKTSVIRKYAEGDY SKLLEGATLRLTGEDI PDFQEKVFQSNGTGEKIELSNGTYTLTETSSFDGYKITEPIKFRVNVKVFIVQKDG SQ 143
M18 50 -----STETKTSVIRKYAEGDY SKLLEGATLKLKLSQIEGSGFQEQSFESSTSGQKLQLSDGTYIILTETKSFQGYEIAEPIITFKVTAGKVFIVQKDG SQ 143

M1 378 IENPNKEIVEPYSVEAYNDFEEF SVLTT--QNYAKFY YAKNKGSSQV VYCFNADLKSPPDSEDG GKTMTDPDFTTG-EVKYTHIAGRDLFKYTVKPRDTPDPTFLKHIKKVI EKGYREK 493
M28 368 VENPNKEVGSPTYIEAYNDFDEFGLLS---TQNYAKFY YGKNYDGS SQIVYCFNANLKSPPDSEDHGATINPDFTTG-DIRYSHIAGS DLIKYANTARDEDPQLFLKHVKKVIENGYHKK 483
M12 371 VENPNKEVAEPYSVEAYSDMQDSNYINPETFTPYGKFY YAKNKGSSQV VYCFNADLHSPPESEDGGGTIDPDI STMKEVKYTHTAGS DLFKYLALRPRDTNPEDFLKHIKKVI EKGYNKK 490
M49 361 VENPNKEVAEPYSVEAYNDFMDEEVLSG--FTPYGKFY YAKNKGSSQV VYCFNADLHSPDSDYDSGETINPDSTMTKEVKYTHTAGS DLFKYLALRPRDTNPEDFLKHIKKVI EKGYKKK 478
M3 362 VENQNKEIAEPYSVTA FNDFEEI GYLS--DFNNGYKFY YAKNTNGTNQV VYCFNADLHSPDSDYDHGANIDPDVSESEKI KYTHVSGYDLYKYAATPRDKDADFFLKHIKKILDKGYKKK 479
M5 144 VENPNKELGSPYTI EAYNDFDEFGLLS---TQNYAKFY YGKNYDGS SQIVYCFNANLKSPPDSEDHGATINPDFTTG-DIRYSHIAGS DLIKYANTARDEDPQLFLKHVKKVIENGYHKK 259
M18 144 VENQNKEVAEPYSVTA FNDFDSDGFINPKTFTPYGKFY YAKNANGTSQV VYCFNVDLHSPDSDLDKGETIDPDFNEGKEIKYTHILGADLFSYANNPRASTNDELLSQVKKVLEKGYRDD 263

M1 494 GQAI EYSGLTETQLRAATQLAIYYFTDS AELDKD K----LKDYHGF GDMNDSTLAVAKILVEYA QDSN-PPQLTDLDF FIPNNSKYCSLIGTQWHPEDLVDIRMEDKK-EVIPVTHNLT 607
M28 484 GQAI PYNGLTEAQFRAATQLAIYYFTDS VDLTKDR----LKDFHGF GDMNDQTLGVAKKIVEYALSDE-DSKLTNLDF FVPNSKYCSLIGTEYHPDDLVDVIRMEDKKQEVIPVTHSLT 598
M12 491 G--DSYNGLTETQFRAATQLAIYYFTDSDLKTLKTYNNGKGYHGFESMDEKTLAVTKELINYAQDNS-APQLTNLDF FVPNSKYCSLIGTEYHPDDLVDVIRMEDKKQEVIPVTHSLT 607
M49 479 G--DSYNGLTETQFRAATQLAIYYFTDSADLTKLTYNNGKGYHGFESMDEKTLAVTKELITYAQNGS-APQLTNLDF FVPNSKYCSLIGTEYHPDDLVDVIRMEDKKQEVIPVTHSLT 595
M3 480 G--DTYKTLTEAQFRAATQLAIYYFTDSADLTKLTYNDNKG YHGFDKLDDATLAVVHELITYAEDVT-LPMTQNLDF FVPNSRYCALIGTQYHPNELIDVISMEDKQAPIIPITHKLT 596
M5 260 GQAI PYNGLTEAQFRAATQLAIYYFTDS VDLTKDR----LKDFHGF GDMNDQTLGVAKKIVEYALSDE-DSKLTNLDF FVPNSKYCSLIGTEYHPDDLVDVIRMEDKKQEVIPVTHSLT 374
M18 264 S--TTYANLTSVEFRAATQLAIYYFTDSVLDNLADY-----HGFGALTTEALNATKEIVAYAEDRANLPNISNLDFYV PNSKYCSLIGTQYHPESLVDIRMEDKQAPIIPITHKLT 375

M1 608 LRITVTGLAGDRTKDFEIEHLKNNKQELLSQTVKTKDNLEFKDGKATINLKHGESLTLQGLPEGYSYLKVT DSEGYKVKVNSQEVANATVSKTGITSDETLAFENKPEVVPPTG--- 724
M28 599 VKITVVGELGDKTKGFQFELELKDKTGQPIVDALKTNNQDLVAKDGKYSFNLKHGDTIRIEGLPTGYSYTLKTEAKDYIVTVDNKVSQEAQSASENVTADKEVTFENRKDLVPPTG--- 715
M12 608 VKITVVGELGDKTKGFQFELELKDKTGQPIVNTLKTNNQDLVAKDGKYSFNLKHGDTIRIEGLPTGYSYTLKTEAKDYIVTVDNKVSQEAQSASENVTADKEVTFENRKDLVPPTG--- 724
M49 596 VKITVVGELGDKTKGFQFELELKDKTGQPIVNTLKTNNQDLVAKDGKYSFNLKHGDTIRIEGLPTGYSYTLKTEAKDYIVTVDNKVSQEAQSVGKDI TEDQKVTTFENRKDLVPPTG--- 712
M3 597 ISITVTGTIADKKKEFNF EIHLSKSSDQAISGTYPTNSGELTVTDGKATF TLKDGESLIVEGLPSGYSYEITETGASDYEVSVNGKNAPDGKATKASVKEDETVAFENRKDLVPPTG--- 713
M5 375 VQITVVGELGDKTKGFQFELELKDKTGQPIVNTLKTNNQDLVAKDGKYSFNLKHGDTIRIEGLPTGYSYTLKTEAKDYIVTVDNKVSQEAQSASENVTADKEVTFENRKDLVPPTG--- 491
M18 376 ISITVTGTIADKKKEFNF EIHLSKSSDQAISGTYPTNSGELTVTDGKATF TLKDGESLIVEGLPSGYSYEITETGASDYEVSVNGKNAPDGKATKASVKEDETTTFENRKDLVPPTG--- 492

```

Supplemental Fig. 1

**B**

```

M1      1  MKKTRFPNKLNTLNTQRVLSKNSKRFTVTLVGVFLMIFALVT--SMVGAKTVFLVESSTPNAINPDSSEYRWYGYESYVRGHPYKQFRVAHDLRVNLEGSRSYQVYCFNLLKAFPLG 118
M28    1  ---MNNKKLQKKQDAPRVSNRKPQLTTLVGVFLMLLVLIG-FEGKVRAAHELVEVPVPIFHNPDQSDYQWYGYEAYTGGYPKYDLFKTYHDLRVNLHGSKSYQVYCFNVHKHYPRS 116
M12    1  ---MNNKKLQKKQDAPRVSNRKPQLTTLVGVFLMFLTLVSSMRGAQSIFGEEKRIEVSVPKIKSPDDAYPWYGYDSYDSSHPYERFKVAHDLRVNLNGSKSYQVYCFNINSHYPNR 117
M49    1  -----MQKRDKTNYRSANNKRRQTTIGLLKVFLTFVALIG----IVGFSIRAFGAEEQSVPNRQSSIQDYWPWYGYDSYPKGYPDYSPLKTYHNLKVNLEGSKDYQAYCFNLTKHFPSK 109
M3     1  -----MQKRDKTNYGSANNKRRQTTIGLLKVFLTFVALIG----IVGFSIRAFGAEEQSVPNKQSSVQDYPWYGYDSYSKGYPDYSPLKTYHNLKVNLDGSKEYQAYCFNLTKHFPSK 109
M5     1  -----MQKRDKTNYGSANNKRRQTTIGLLKVFLTFVALIG-IVGFS----- 40
M18    1  -----MQKRDKTNYGSANNKRRQTTIGLLKVFLTFVALIG----IVGFSIRAFGAEEQ----- 49

M1    119  SDSSVKKWYKXHDGISTKFEDYAMSPRITGDELNQLRAVMYNGHPQNANGIMEGLEPLNAILVTQEAVWYYSNAPISNPDESFKRESESNLVSTSQLSLMRQALKQLIDPNLATKMPK 238
M28   117  SQSFDRKWKYKLDGTAENFDLAMEPRVRKEELTKKLRAVMYNAYPNDANGIMKDLEPLNAILVTQEAVWYYSDSAQIN-PDESFKTEAQSNGINDQQLGLMRKALKELIDPNLGSKYSN 235
M12   118  KNAFSKQWFKRVDGTGDVFTNYAQTTPKIRGESLNNKLLSIMYNAYPKNANGYMDKIEPLNAILVTQQAVWYYSDSYGN-IKTLWASELKDGGIDFEQVKLMREAYSKLISDDLEETSKN 236
M49   110  SDSVRSQWYKKEGTNENFIKLADKPRIEDGQLQQNILRILYNGYPNNRNGIMKGIDPLNAILVTQNAIWYYPDQAQIN-PDESFKTEARSNGINDQQLGLMRKALKELIDPNLGSKYSN 228
M3    110  SDSVRSQWYKKEGTNENFIKLADKPRIEDGQLQQNILRILYNGYPNDRNGIMKGIDPLNAILVTQNAIWYYPDSSYISDTSKAFQEEETDLKLDSSQQLQLMRNALKRLINPKEVESLPN 229
M5     40  ----- 40
M18   49  ----- 49

M1    239  QVPDDFQLSIFESEDKGDYKNGYQNLSSGGLVPTKPPTPGDPMPPPNPQPTT 291
M28   236  KTPSGYRLNVFESHDKT-----FQNLSSAEYVPDTPPKPGE--EPPAKTEKT 280
M12   237  KLPQGSKLNIFVPQDKS-----VQNLSSAEYVPESPPAPGQSPPEPPVQTKKT 283
M49   229  KTPSGYRLNVFESHDKT-----FQNLSSAEYVPDTPPKPGE--EPPAKTEKT 273
M3    230  QVPANYQLSIFQSSDKT-----FQNLSSAEYVPDTPPKPGE--EPPAKTEKT 274
M5     41  -----IRAFGAEE--EKSTETKKT 56
M18   50  -----STETKKT 56

```

Supplemental Fig. 1

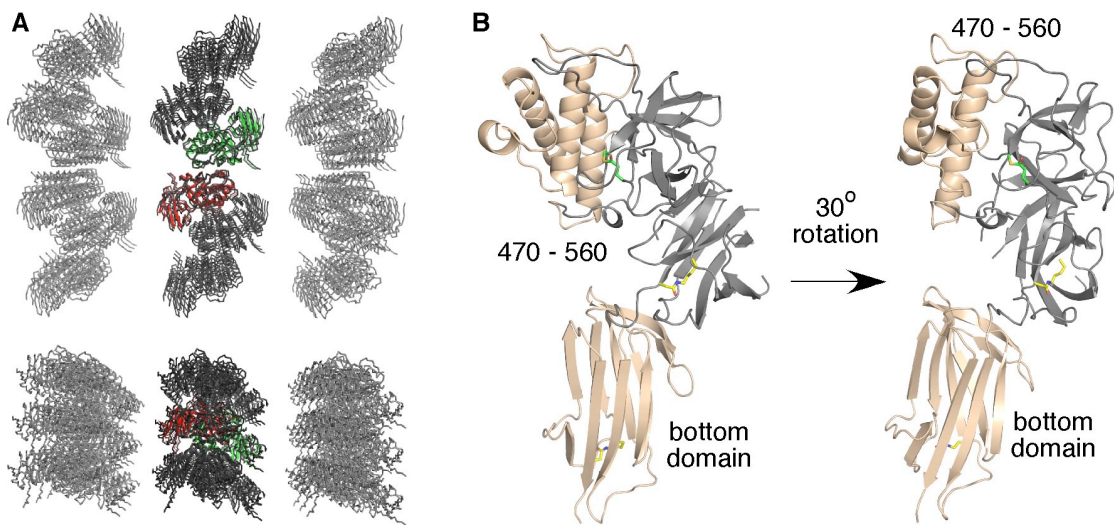

Supplemental Fig. 2





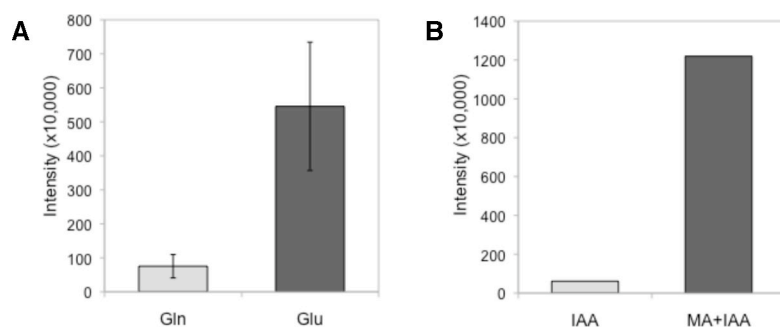

Supplemental Fig. 4

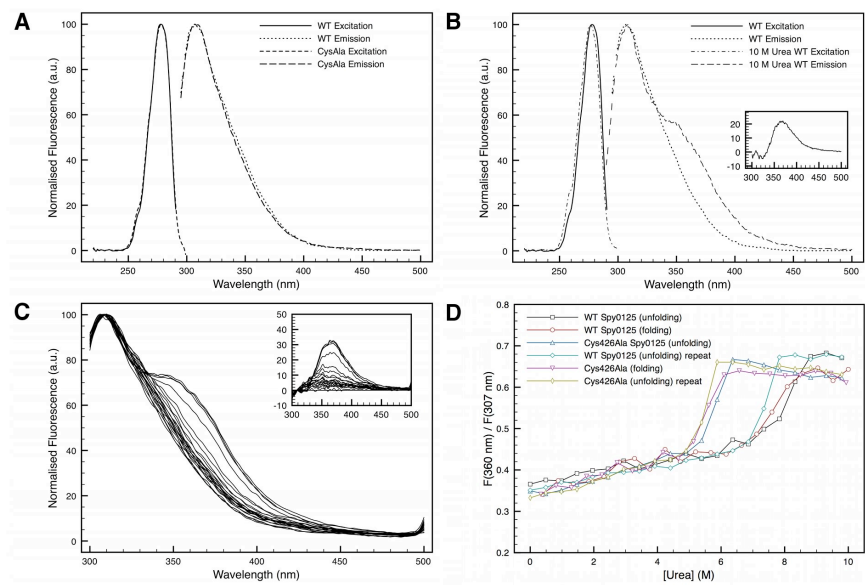

Supplemental Fig. 5

| <i>Spectrum used</i> <sup>a</sup> | <i>Observed m/z</i> <sup>b</sup> | <i>Calculated m/z</i> <sup>b</sup> | $\Delta_{obs:calc}$ | <i>Charge</i>  | <i>Proposed Structure</i>              | <i>Ion type</i> |
|-----------------------------------|----------------------------------|------------------------------------|---------------------|----------------|----------------------------------------|-----------------|
| 2 <sup>+</sup>                    | 234.17                           | 234.15                             | 0.02                | 1 <sup>+</sup> | SK                                     | y2              |
| 2 <sup>+</sup> and 3 <sup>+</sup> | 261.18                           | 261.09                             | 0.09                | 1 <sup>+</sup> | ME                                     | b2'             |
| 3 <sup>+</sup>                    | 341.83                           | 341.74                             | 0.09                | 2 <sup>+</sup> | IGDYSK                                 | y6              |
| 2 <sup>+</sup>                    | 397.25                           | 397.21                             | 0.04                | 1 <sup>+</sup> | YSK                                    | y3              |
| 3 <sup>+</sup>                    | 398.28                           | 398.26                             | 0.02                | 2 <sup>+</sup> | MEDK + KY<br>(-H <sub>2</sub> O)       | b6 parent       |
| 3 <sup>+</sup>                    | 433.92                           | 433.71                             | 0.21                | 2 <sup>+</sup> | MEDK + KYA<br>(-H <sub>2</sub> O)      | b7 parent       |
| 3 <sup>+</sup>                    | 490.45                           | 490.25                             | 0.2                 | 2 <sup>+</sup> | MEDK + KYAI<br>(-H <sub>2</sub> O)     | b8 parent       |
| 2 <sup>+</sup>                    | 512.25                           | 512.24                             | 0.01                | 1 <sup>+</sup> | DYSK                                   | y4              |
| 2 <sup>+</sup> and 3 <sup>+</sup> | 569.31                           | 569.26                             | 0.05                | 1 <sup>+</sup> | GDYSK                                  | y5              |
| 2 <sup>+</sup>                    | 632.18                           | 632.31                             | 0.13                | 1 <sup>+</sup> | MEDK + K (-H <sub>2</sub> O)           | b5 parent       |
| 2 <sup>+</sup> and 3 <sup>+</sup> | 682.27                           | 682.34                             | 0.07                | 1 <sup>+</sup> | IGDYSK                                 | y6              |
| 2 <sup>+</sup> and 3 <sup>+</sup> | 753.31                           | 753.38                             | 0.07                | 1 <sup>+</sup> | AIGDYSK                                | y7              |
| 2 <sup>+</sup> and 3 <sup>+</sup> | 795.40                           | 795.28                             | 0.12                | 1 <sup>+</sup> | MEDK + KY<br>(-H <sub>2</sub> O)       | b6 parent       |
| 2 <sup>+</sup> and 3 <sup>+</sup> | 866.49                           | 866.41                             | 0.08                | 1 <sup>+</sup> | MEDK + KYA<br>(-H <sub>2</sub> O)      | b7 parent       |
| 2 <sup>+</sup> and 3 <sup>+</sup> | 916.34                           | 916.44                             | 0.10                | 1 <sup>+</sup> | YAIGDYSK                               | y8              |
| 2 <sup>+</sup>                    | 979.49                           | 979.50                             | 0.01                | 1 <sup>+</sup> | MEDK + KYAI<br>(-H <sub>2</sub> O)     | b8 parent       |
| 2 <sup>+</sup>                    | 1036.49                          | 1036.52                            | 0.03                | 1 <sup>+</sup> | MEDK + KYAIG<br>(-H <sub>2</sub> O)    | b9 parent       |
| 2 <sup>+</sup>                    | 1151.48                          | 1151.55                            | 0.07                | 1 <sup>+</sup> | MEDK + KYAIGD<br>(-H <sub>2</sub> O)   | b10 parent      |
| 2 <sup>+</sup>                    | 1287.42                          | 1287.66                            | 0.24                | 1 <sup>+</sup> | KYAIGDYSK + DK<br>(-H <sub>2</sub> O)  | y11 parent      |
| 2 <sup>+</sup>                    | 1314.48                          | 1314.61                            | 0.13                | 1 <sup>+</sup> | MEDK + KYAIGDY<br>(-H <sub>2</sub> O)  | b11 parent      |
| 2 <sup>+</sup>                    | 1401.52                          | 1401.64                            | 0.12                | 1 <sup>+</sup> | MEDK + KYAIGDYS<br>(-H <sub>2</sub> O) | b12 parent      |
| 2 <sup>+</sup>                    | 1401.52                          | 1401.64                            | 0.18                | 1+             | KYAIGDYSK + MED<br>(-H <sub>2</sub> O) | b3 parent       |
| 2 <sup>+</sup>                    | 1416.57                          | 1416.70                            | 0.13                | 1+             | KYAIGDYSK + EDK<br>(-H <sub>2</sub> O) | y12 parent      |

<sup>a</sup> 2<sup>+</sup> = (m/z) 774.37<sup>2+</sup>; 3<sup>+</sup> = (m/z) 516.59<sup>3+</sup>

<sup>b</sup> Monoisotopic masses.

SUPPLEMENTAL TABLE 1. MS/MS of peptides with m/z 774.37<sup>2+</sup> and 516.59<sup>3+</sup> containing the Lys297-Asp595 isopeptide bond of Spy0125-CTR.

| <i>Spectrum used</i> <sup>a</sup> | <i>Observed m/z</i> <sup>b</sup> | <i>Calculated m/z</i> <sup>b</sup> | $\Delta_{obs:calc}$ | <i>Charge</i>  | <i>Proposed Structure</i>                               | <i>Ion type</i> |
|-----------------------------------|----------------------------------|------------------------------------|---------------------|----------------|---------------------------------------------------------|-----------------|
| 4 <sup>+</sup>                    | 213.08                           | 213.16                             | 0.08                | 1 <sup>+</sup> | VI                                                      | b2              |
| 4 <sup>+</sup>                    | 217.13                           | 217.12                             | 0.01                | 1 <sup>+</sup> | PT                                                      | y2'             |
| 3 <sup>+</sup> and 4 <sup>+</sup> | 316.14                           | 316.19                             | 0.05                | 1 <sup>+</sup> | VPT                                                     | y3'             |
| 3 <sup>+</sup> and 4 <sup>+</sup> | 418.11                           | 418.23                             | 0.12                | 1 <sup>+</sup> | TGLAG                                                   | y5              |
| 4 <sup>+</sup>                    | 510.22                           | 510.33                             | 0.11                | 1 <sup>+</sup> | VIPVT                                                   | b5              |
| 3 <sup>+</sup> and 4 <sup>+</sup> | 512.40                           | 512.31                             | 0.09                | 1 <sup>+</sup> | PVVPT                                                   | y5'             |
| 4 <sup>+</sup>                    | 647.44                           | 647.39                             | 0.05                | 1 <sup>+</sup> | VIPVTH                                                  | b6              |
| 3 <sup>+</sup> and 4 <sup>+</sup> | 761.43                           | 761.43                             | 0.00                | 1 <sup>+</sup> | VIPVTHN                                                 | b7              |
| 3 <sup>+</sup> and 4 <sup>+</sup> | 874.37                           | 874.52                             | 0.15                | 1 <sup>+</sup> | VIPVTHNL                                                | b8              |
| 3 <sup>+</sup>                    | 1101.15                          | 1101.16                            | 0.01                | 2 <sup>+</sup> | VIPVTHNLTLRKTVTGLAG<br>+ NN (-NH <sub>3</sub> )         | b21'<br>parent  |
| 3 <sup>+</sup>                    | 1229.44                          | 1229.73                            | 0.29                | 2 <sup>+</sup> | VIPVTHNLTLRKTVTGLAG<br>+ NNKE (-NH <sub>3</sub> )       | b23'<br>parent  |
| 3 <sup>+</sup>                    | 1276.55                          | 1276.77                            | 0.22                | 2 <sup>+</sup> | VIPVTHNLTLRKT<br>+ NNKEPVVPT (-NH <sub>3</sub> )        | b14<br>parent   |
| 3 <sup>+</sup>                    | 1327.59                          | 1327.29                            | 0.30                | 2 <sup>+</sup> | VIPVTHNLTLRKT<br>+ NNKEPVVPT (-NH <sub>3</sub> )        | b15<br>parent   |
| 3 <sup>+</sup>                    | 1327.59                          | 1327.79                            | 0.20                | 2 <sup>+</sup> | VIPVTHNLTLRKTVTGLAG<br>+ NNKEPV (-NH <sub>3</sub> )     | b25'<br>parent  |
| 3 <sup>+</sup>                    | 1377.38                          | 1377.32                            | 0.06                | 2 <sup>+</sup> | VIPVTHNLTLRKTVTGLAG<br>+ NNKEPVV (-NH <sub>3</sub> )    | b26'<br>parent  |
| 3 <sup>+</sup>                    | 1412.39                          | 1412.34                            | 0.04                | 2 <sup>+</sup> | VIPVTHNLTLRKTVTGLAGL<br>+ NNKEPVVPT (-NH <sub>3</sub> ) | b17<br>parent   |

<sup>a</sup> 3<sup>+</sup> = (m/z) 990.57<sup>3+</sup>; 4<sup>+</sup> = (m/z) 743.18<sup>4+</sup>

<sup>b</sup> Monoisotopic masses.

SUPPLEMENTAL TABLE 2: MS/MS of peptides with m/z 990.57<sup>3+</sup> and 743.18<sup>4+</sup> containing the Lys610-Asn715 isopeptide bond of Spy0125-CTR.

| <i>Spy0125 Sample</i>                                     | <i>Proposed peptide Sequence</i>    | <i>Observed m/z</i> <sup>a</sup> | <i>Mass (Da, experimental)</i> <sup>a</sup> | <i>Mass (Da, calculated)</i> <sup>a</sup> | <i>Δ<sub>obs:calc</sub></i> | <i>Mascot score</i> | <i>P value from Mascot</i> |
|-----------------------------------------------------------|-------------------------------------|----------------------------------|---------------------------------------------|-------------------------------------------|-----------------------------|---------------------|----------------------------|
| Wild-type                                                 | <u>Y</u> <i>ES</i> LIGTQWHPEDLVDIIR | 1142.59 <sup>2+</sup>            | 2283.15                                     | 2283.15                                   | 0.00                        | 81.0                | 8.0 x 10 <sup>-9</sup>     |
| Incubation with methylamine                               | <u>Y</u> <i>Q</i> SLIGTQWHPEDLVDIIR | 1149.10 <sup>2+</sup>            | 2296.18                                     | 2296.19                                   | 0.01                        | 95.1                | 3.1 x 10 <sup>-10</sup>    |
| Incubation with methylamine and iodoacetamide             | NGSSQVVY <u>C</u> FNADLK            | 851.40 <sup>2+</sup>             | 1700.79                                     | 1700.78                                   | 0.01                        | 89.0                | 1.30 x 10 <sup>-9</sup>    |
| Incubation with DTT and iodoacetamide (prior to digest)   | NGSSQVVY <u>C</u> FNADLK            | 851.40 <sup>2+</sup>             | 1700.79                                     | 1700.78                                   | 0.01                        | 99.3                | 1.2 x 10 <sup>-10</sup>    |
| Incubation with DTT (digested peptides)                   | NGSSQVVYCFNADLK                     | 822.89 <sup>2+</sup>             | 1643.76                                     | 1643.76                                   | 0.00                        | 103.6               | 4.3 x 10 <sup>-11</sup>    |
| Incubation with DTT and iodoacetamide (digested peptides) | NGSSQVVY <u>C</u> FNADLK            | 851.40 <sup>2+</sup>             | 1700.78                                     | 1700.78                                   | 0.00                        | 80.1                | 9.7 x 10 <sup>-9</sup>     |

<sup>a</sup> Monoisotopic masses.

SUPPLEMENTAL TABLE 3: *Peptides with various modifications at the position of the thioester in the intact protein, as detected by mass spectrometry analysis. Residues in italics and underlined are those modified from the wild-type protein sequence.*
